# Supplementary material for: Eliminating hydrolytic activity without affecting the transglycosylation of a GH1 β-glucosidase
Source: PubMed Central journal article supplement (PMC5247548; doi:10.1007/s00253-016-7833-9), 2016-09-27
Supplement: 253_2016_7833_MOESM1_ESM.pdf [file 253_2016_7833_MOESM1_ESM.pdf]

Supplementary material

**Applied Microbiology and Biotechnology**

**Eliminating hydrolytic activity without affecting  
the transglycosylation of a GH1  $\beta$ -glucosidase**

**Pontus Lundemo, Eva Nordberg Karlsson, Patrick Adlercreutz**

Lund University, Dept of Chemistry, Biotechnology, P.O. Box 124, SE-221 00 Lund, Sweden

Corresponding author: Patrick Adlercreutz, Phone: +46462224842, Email:

patrick.adlercreutz@biotek.lu.se

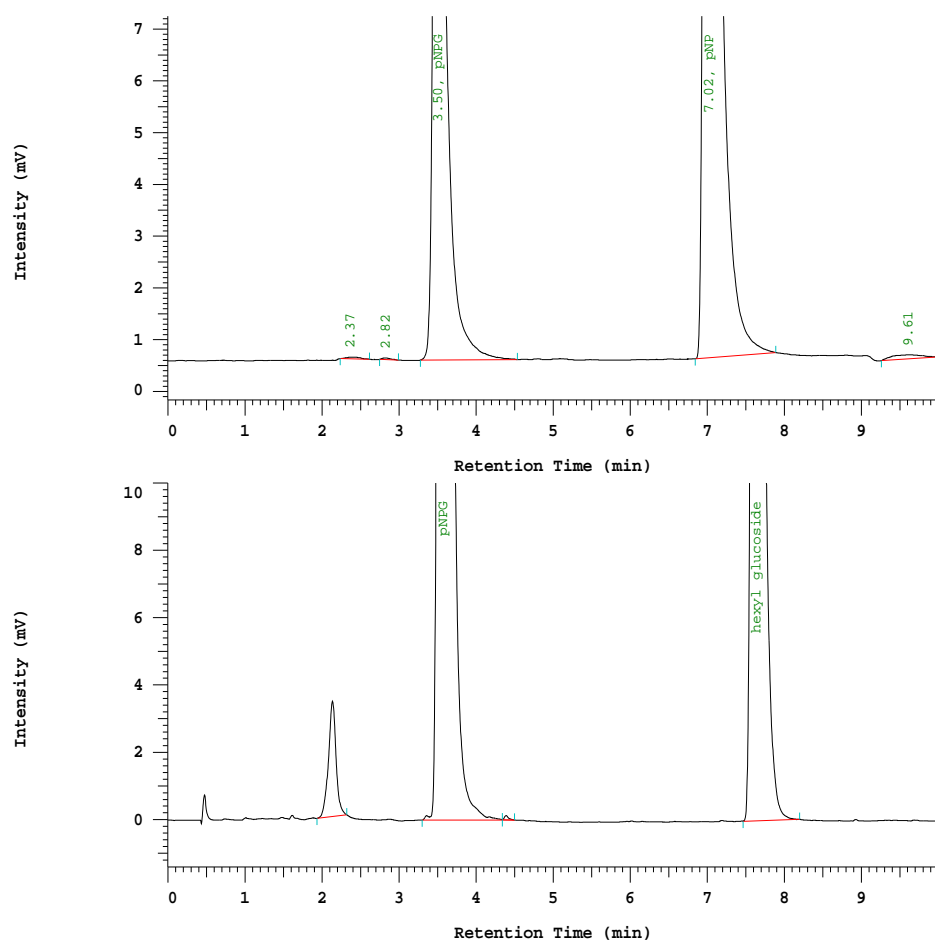

**Fig. S1** Sample chromatograms of a transglycosylation reaction between *p*-nitrophenol- $\beta$ -D-glucoside (*p*NPG) and hexanol. Absorbtion at 405nm (top) and ELSD detection (bottom) is used and the ELSD peak at 2.2 min is the void peak.

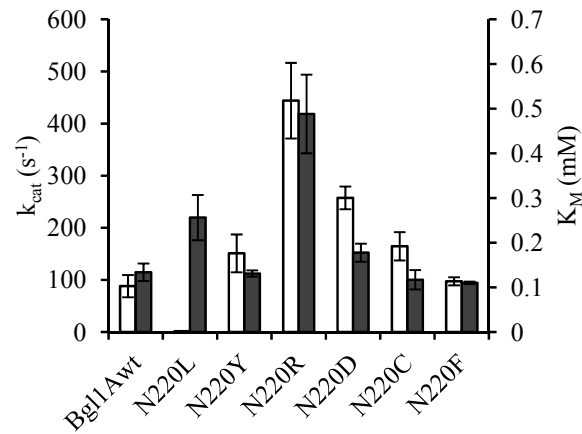

**Fig. S2** Steady-state kinetic parameters,  $k_{cat}$  (white bars) and  $K_M$  (grey bars) for hydrolysis of *p*-nitrophenyl- $\beta$ -D-glucopyranoside by *TnBgl1A* and single point mutants thereof in 0.1 M citrate phosphate buffer pH 6.0. Error bars represent  $1\sigma$ .

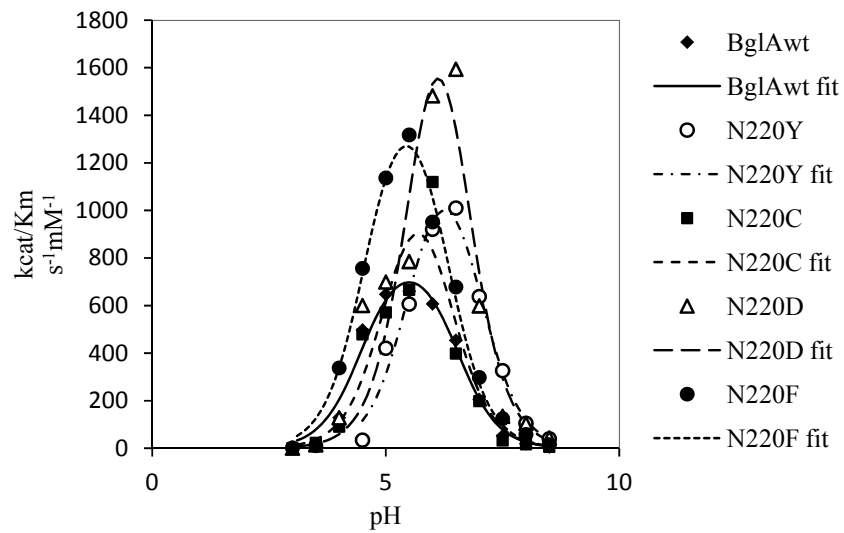

**Fig. S3** pH dependence of  $k_{cat}/K_M$  for *TnBgl1A* and single mutants thereof along with their model-fitted curves.

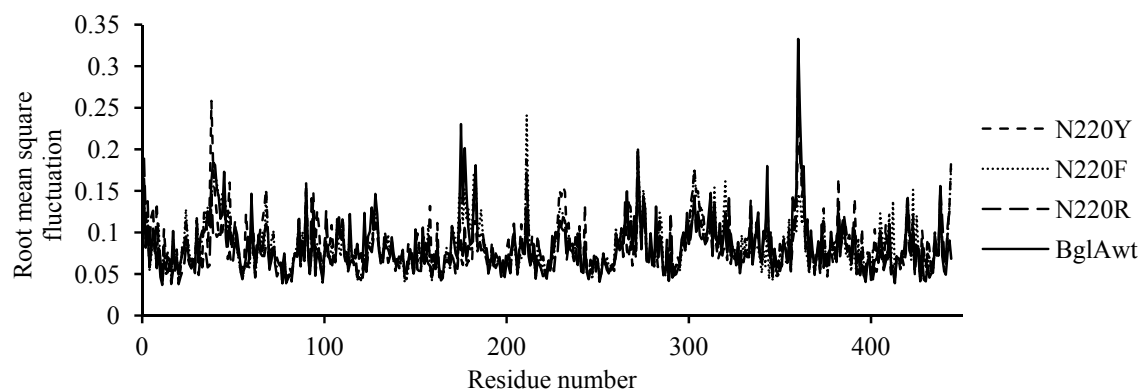

**Fig. S4** Root mean square fluctuation for each amino acid of 500 ns simulations at room temperature for *TnBgl1Awt* and mutants N220Y, N220F and N220R.

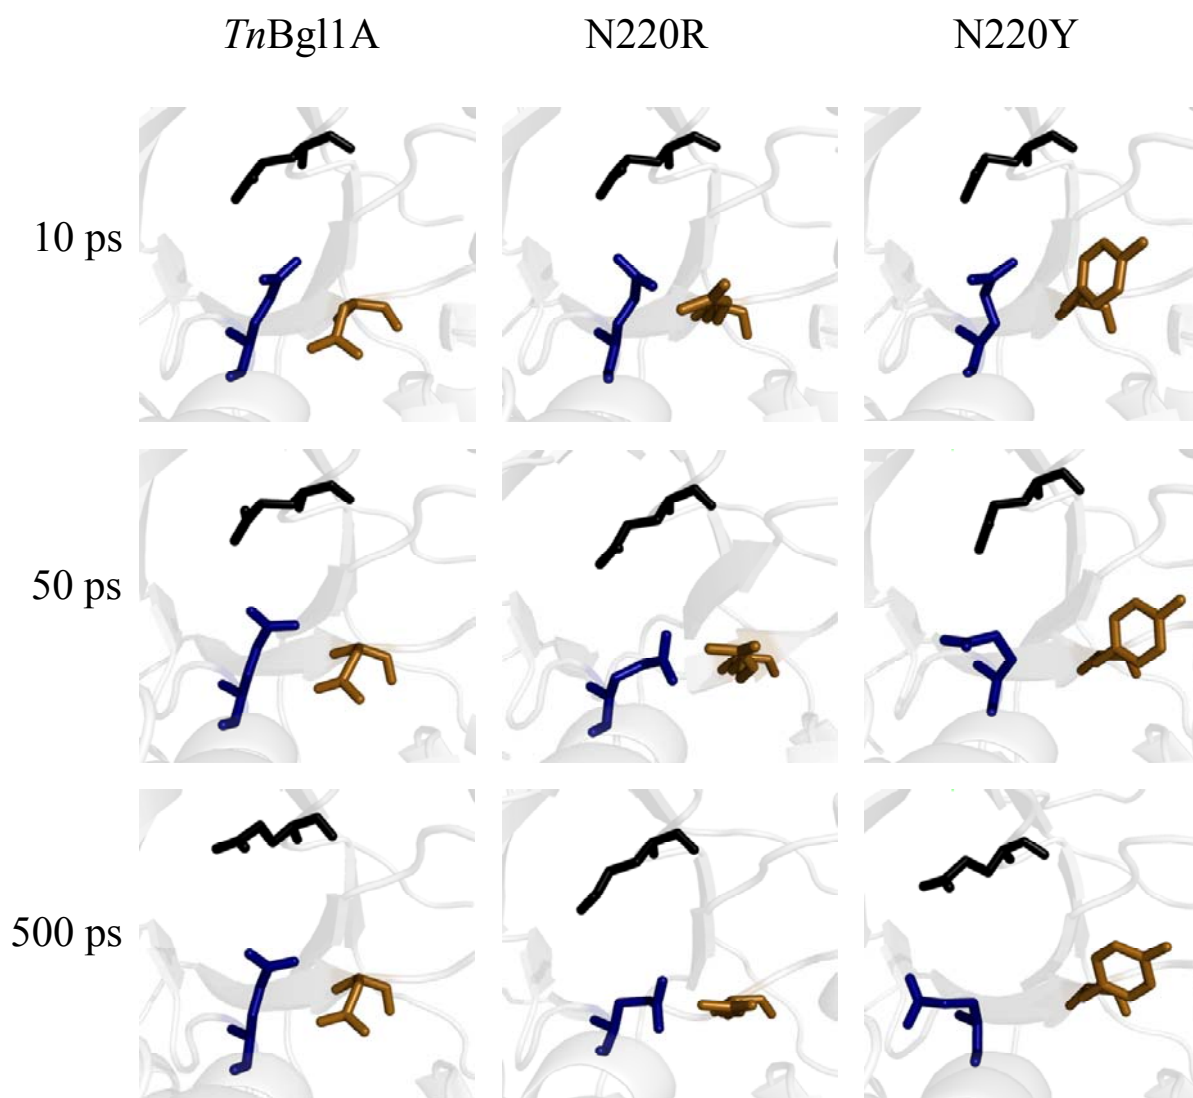

**Figure S5** Orientation of the catalytic nucleophile (black), acid/base (dark blue) and position N220 (brown) at different time-points of a molecular dynamics simulation.
